# Supplementary material for: Preharvest Spray Hexanal Formulation Enhances Postharvest Quality in ‘Honeycrisp’ Apples by Regulating Phospholipase D and Calcium Sensor Proteins Genes
Source: MDPI journal article supplement (doi:10.3390/plants10112332), 2021-10-28
Supplement: s1 [file s1]

# Preharvest Spray Hexanal Formulation Enhances Postharvest Quality in ‘Honeycrisp’

## Apples by Regulating Phospholipase D and Calcium Sensor Proteins Genes

Karthika Sriskantharajah <sup>1</sup>, Walid El Kayal <sup>2,3</sup>, Murali M. Ayyanath <sup>1</sup>, Praveen K. Saxena <sup>1</sup>, Alan J. Sullivan <sup>1</sup>, Gopinadhan Paliyath <sup>1</sup> and Jayasankar Subramanian <sup>2\*</sup>

### Supplementary Materials

**Table S1:** Primer sequence of genes putatively encoding phospholipase D and calcium sensor proteins

| No | Gene             | Gene ID/accession #<br>( <i>Malus domestica</i> ) | Forward primer       | Reverse Primer       |
|----|------------------|---------------------------------------------------|----------------------|----------------------|
| 1  | MdCaM2           | MDP0000183898                                     | ATGGGACCATTGATTTTCCA | CAGCCTCACGAATCATCTCA |
| 2  | MdCaM4           | MDP0000277474                                     | TGCTACCTCCCATCCTTCAG | CATCTTCCTCGCCATCAAAT |
| 3  | MdCML1           | MD02G1202000                                      | GACGGTTACCTGGACCGTTA | TTCCCGTCTTTGTTGGAGTC |
| 4  | MdCML18          | MD10G1094100                                      | TGCAACCTCATCTTTTGCAG | TTCCCTCACAATCCCTTCAG |
| 5  | MdPLD $\alpha$ 1 | XM_008375733.3                                    | CAGAGGTGGAGAAAGCAAGG | AGCTGCATCTTCAGGCGTAT |
| 6  | MdPLD $\alpha$ 4 | XM_008393094.3                                    | TGAGATCCAAGGGGAGTTTG | GTTATCGCCATTGTCGGACT |
| 7  | MdAct            | XM_008362405.3                                    | GTGGATTGCAAAGGCAGAGT | CATAATTTGCTCGCCTCCAT |
| 8  | MdHis3           | AY347801.1                                        | TGGAAGTGTGCTCTTCGTG  | CTCAAACAACCCGACAAGGT |

Sequencing details to the gene set 1-6 were obtained from the Genomic Database for Rosaceae and 5 -8 from the NCBI database.

**Table S2:** Effects of preharvest sprays on fruit quality traits fresh weight, firmness and TSS in ‘Honeycrisp’ apples after removal from cold storage (2.5 °C) to room temperature storage (~20 °C)

| Variant                                  | Days removal after cold storage |                                    |                                    |                                    |
|------------------------------------------|---------------------------------|------------------------------------|------------------------------------|------------------------------------|
|                                          | Treatment                       | 30                                 | 60                                 | 90                                 |
| Mean fresh weight over 14 d at 20 °C (g) | Control                         | 262 (252 - 272) <sup>b</sup>       | 257 (247 - 266) <sup>b</sup>       | 339 (317 - 360) <sup>a</sup>       |
|                                          | Hexanal                         | 284 (275 - 294) <sup>a</sup>       | 280 (271 - 290) <sup>a</sup>       | 326 (305 - 348) <sup>a</sup>       |
|                                          | Harvista                        | 260 (250 - 269) <sup>b</sup>       | 254 (245 - 264) <sup>b</sup>       | 272 (251 - 293) <sup>b</sup>       |
| Mean firmness over 14 d at 20 °C (N)     | Control                         | 54.55 (52.88 - 56.21) <sup>c</sup> | 54.28 (52.33 - 56.27) <sup>a</sup> | 51.70 (49.66 - 53.74) <sup>a</sup> |
|                                          | Hexanal                         | 60.31 (58.64 - 61.98) <sup>b</sup> | 56.9 (54.94 - 58.85) <sup>a</sup>  | 52.72 (50.68 - 54.77) <sup>a</sup> |
|                                          | Harvista                        | 64.27 (62.6 - 65.94) <sup>a</sup>  | 56.42 (54.47 - 58.37) <sup>a</sup> | 50.73 (48.69 - 52.77) <sup>a</sup> |
| Mean TSS over 14 d at 20 °C (°Brix)      | Control                         | 12.09 (11.87 - 12.31) <sup>b</sup> | 12.89 (12.75 - 12.99) <sup>a</sup> | 12.58 (12.32 - 12.84) <sup>b</sup> |
|                                          | Hexanal                         | 12.99 (12.77 - 13.22) <sup>a</sup> | 12.93 (12.82 - 13.03) <sup>a</sup> | 13.63 (13.37 - 13.89) <sup>a</sup> |
|                                          | Harvista                        | 12.95 (12.73 - 13.17) <sup>a</sup> | 12.86 (12.75 - 12.97) <sup>a</sup> | 13.36 (13.10 - 13.63) <sup>a</sup> |

\*Fruit were removed from cold storage after 30, 60 and 90 days postharvest and kept for 14 days at room temperature at ~20 °C (RmT). Values represent the mean  $\pm$  SD of 10 randomly selected fruit. Means followed by different letters indicate significant differences among hexanal, Harvista<sup>TM</sup> and control treatments at the same sampling time based on the Tukey-Kramer test at  $\alpha = 0.05$ .

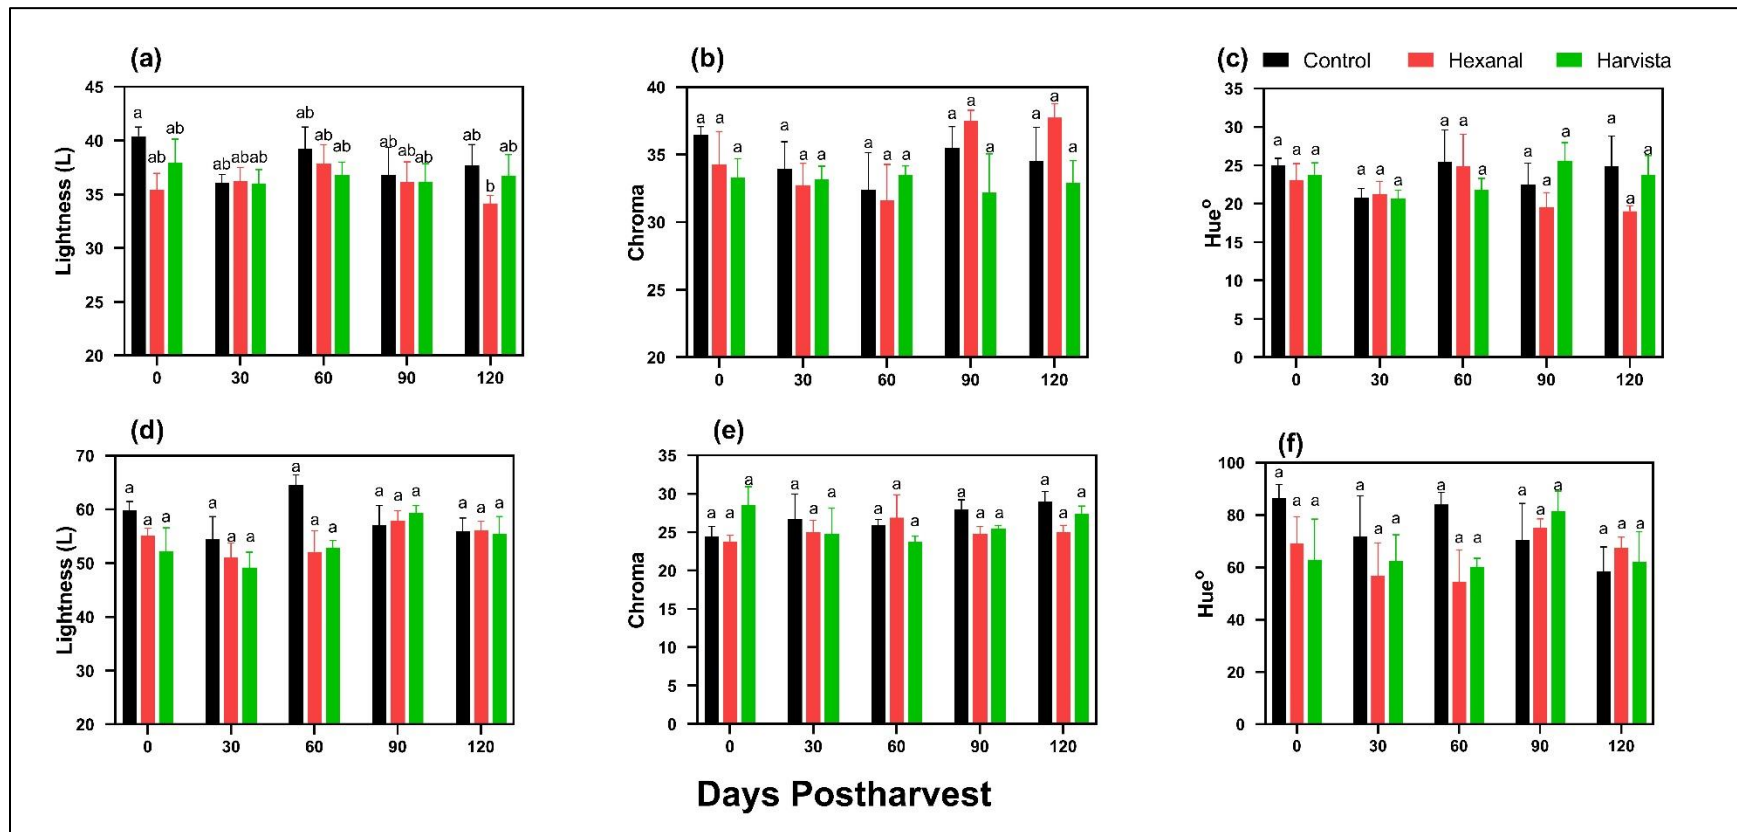

**Figure S1:** The effects of preharvest sprays on variations in color parameters (a-c) of blush and (d-f) of background of 'Honeycrisp' throughout the cold storage (2.5 °C). L indicates the brightness in the CIE lab system readings. Chroma and Hue angle were calculated using the software available at <http://www.easyrgb.com> (accessed 5, August 2020). Each value represents the least-squares means  $\pm$  SE of eight fruit. LS means with the same letter are not significantly different when comparing treatments with days postharvest based on the Tukey-Kramer test at  $\alpha = 0.05$ .
